# Supplementary material for: A two-step method to prepare P2-type layered oxide materials for stable sodium-ion batteries via a precursor and sintering temperature control
Source: Royal Society of Chemistry journal article supplement (doi:10.1039/d4ce00209a), 2024-01-01
Supplement: d4ce00209a1.pdf [file d4ce00209a1.pdf]

## Supporting information

### Two-step method to prepare P2-type layered oxide materials for stable sodium-ion batteries via precursor and sintering temperature control

Xinhua Sun<sup>1</sup>, Yan Zhang<sup>2</sup>, Jianmin Zhang<sup>1\*</sup> and Zongmin Zheng<sup>1\*</sup>

1. National Engineering Research Center for Intelligent Electrical Vehicle Power System, College of Mechanical and Electrical Engineering, Qingdao University, Qingdao, 266071, China.

2. Institute of Advanced Cross-field Science, College of Life Sciences, Qingdao University, Qingdao, 266071, China.

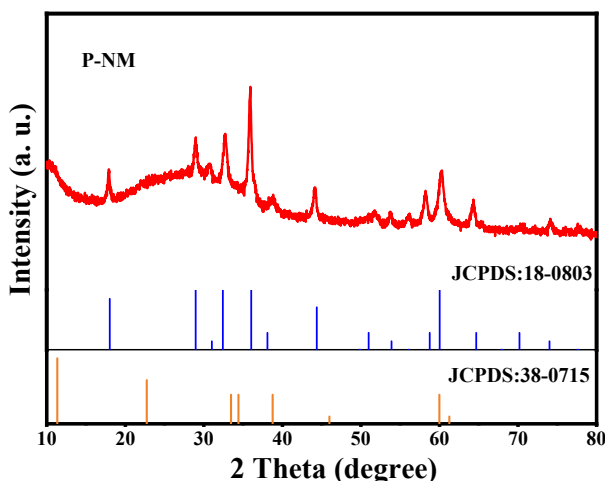

Fig. S1. XRD pattern of P-NM

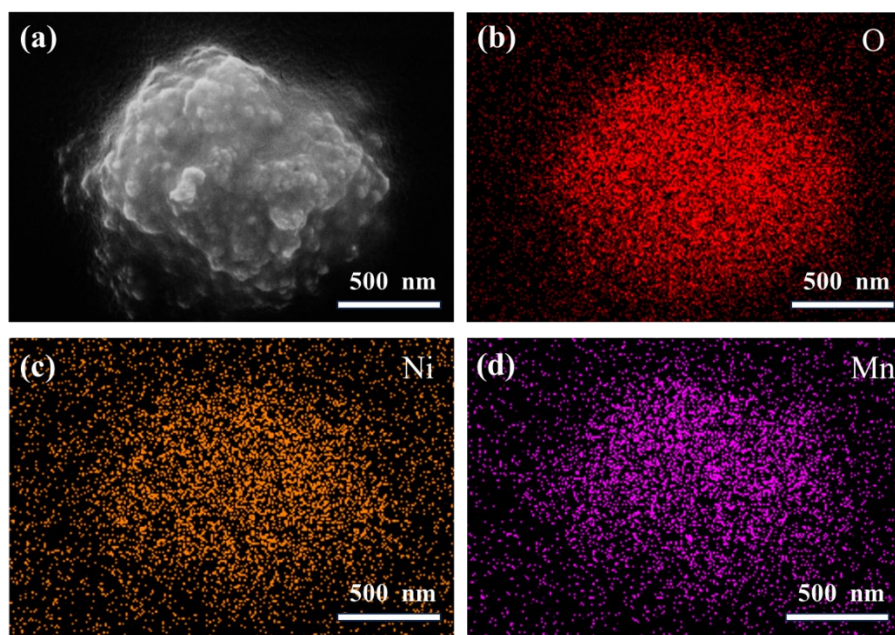

**Fig. S2.** SEM image and O, Ni, Mn element mappings of P-NM.

**Table S1.** The relative intensity (R.I.) of different (h k l) in different XRD patterns.

| R.I.<br>Sample | (002)/(100) | (002)/(012) | (002)/(104) |
|----------------|-------------|-------------|-------------|
| PS-850         | 2.94        | 2.85        | 3.16        |
| PS-900         | 2.30        | 1.32        | 1.45        |
| PS-950         | 2.11        | 1.33        | 1.44        |
| PS-100         | 2.16        | 1.54        | 1.73        |
| S-900          | 2.99        | 2.25        | 2.83        |

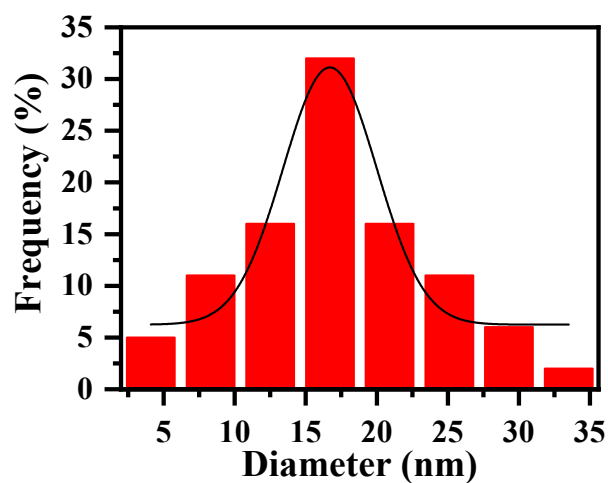

Fig. S3. Particle size analysis statistics of P-NM

Table S2. The detail rate properties of all cells (the data of the capacities collected from the last discharge process)

| Cells<br>Rate | PS-850<br>(mAh g <sup>-1</sup> ) | PS-900<br>(mAh g <sup>-1</sup> ) | PS-950<br>(mAh g <sup>-1</sup> ) | PS-1000<br>(mAh g <sup>-1</sup> ) | S-900<br>(mAh g <sup>-1</sup> ) |
|---------------|----------------------------------|----------------------------------|----------------------------------|-----------------------------------|---------------------------------|
| 0.1 C         | 162.9                            | 149.8                            | 139.6                            | 138.5                             | 154.5                           |
| 0.2 C         | 140.5                            | 140.7                            | 131.6                            | 125.8                             | 138.4                           |
| 0.5 C         | 117.8                            | 130.0                            | 121.1                            | 114.6                             | 120.6                           |
| 1 C           | 97.7                             | 117.2                            | 110.0                            | 105.7                             | 104.1                           |
| 2 C           | 68.0                             | 98.3                             | 91.7                             | 91.5                              | 86.6                            |
| 5 C           | 23.5                             | 64.8                             | 52.2                             | 61.1                              | 56.1                            |

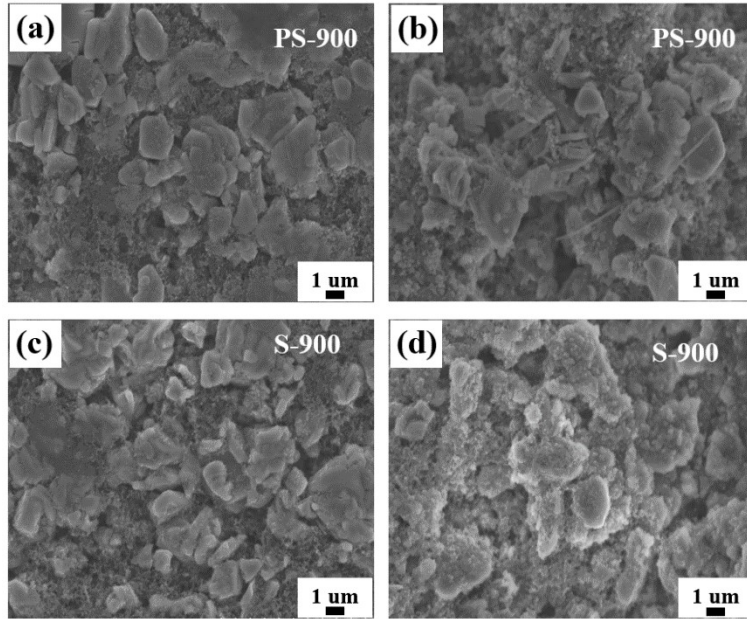

**Fig. S4. SEM images of PS-900 (a) before and (b) after cycles,(c) SEM imagesof S-900 (c) before and (d) after cycles**
